# Supplementary material for: Overall and modality-specific exercise doses for motor skill improvement in cerebral palsy: a systematic review and Bayesian network dose-response meta-analysis
Source: PeerJ journal article supplement (doi:10.7717/peerj.21035), 2026-04-08

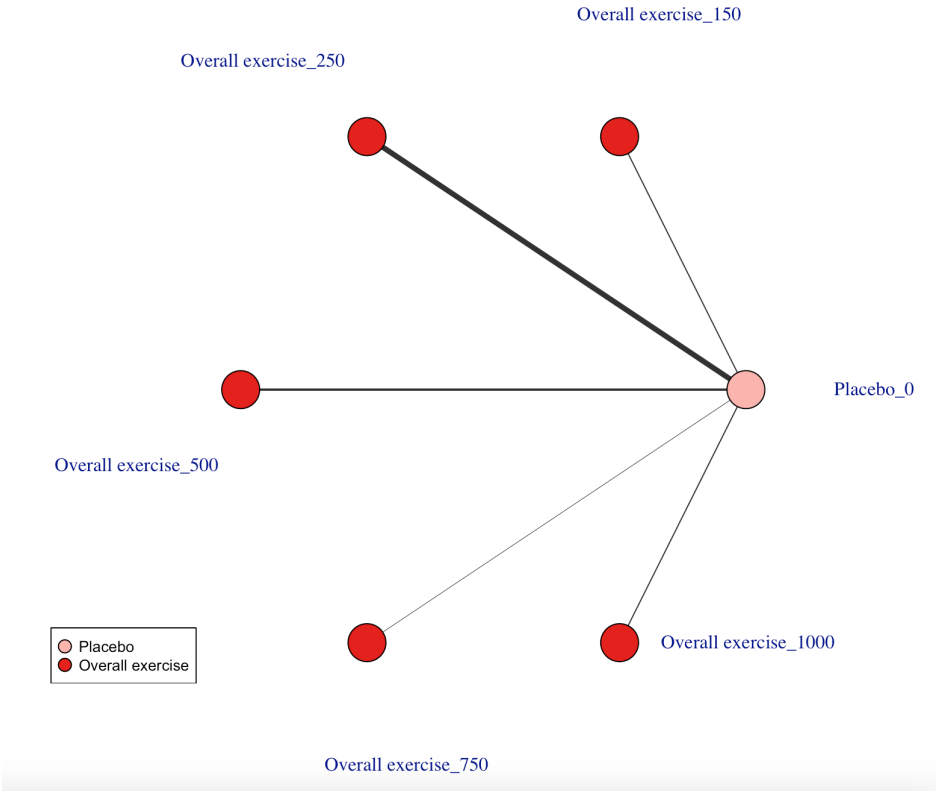

Supplement: Supplementary_Figure_1.pdf [file Supplementary_Figure_1.pdf]
